# Supplementary material
Source: Springer Nature journal article supplement (https://www.springermedizin.de/resource/supplementary/13550_2013_158_MOESM2_ESM.pdf/9687720)

M

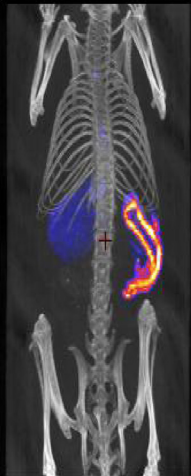

$^{99m}\text{Tc}$ -Ch-DTPA 3 hours

M

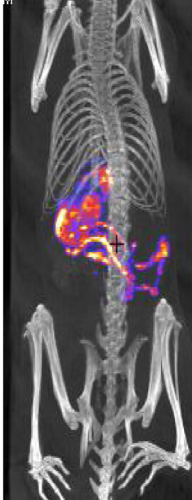

$^{99m}\text{Tc}$ -Amberlite-DTPA 3 hours

Supplement: MOESM2 [file 9687720]
